# Supplementary material for: Simultaneous estimation of wintertime sea ice thickness and snow depth from space-borne freeboard measurements
Source: Copernicus journal article supplement (doi:10.5194/tc-14-3761-2020), 2020-11-06
Supplement: Supplementary file 1 [file tc-14-3761-2020-supplement.pdf]

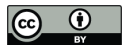

## *Supplement of*

# **Simultaneous estimation of wintertime sea ice thickness and snow depth from space-borne freeboard measurements**

**Hoyeon Shi et al.**

*Correspondence to:* Byung-Ju Sohn ([sohn@snu.ac.kr](mailto:sohn@snu.ac.kr))

The copyright of individual parts of the supplement might differ from the CC BY 4.0 License.

Supplementary figures

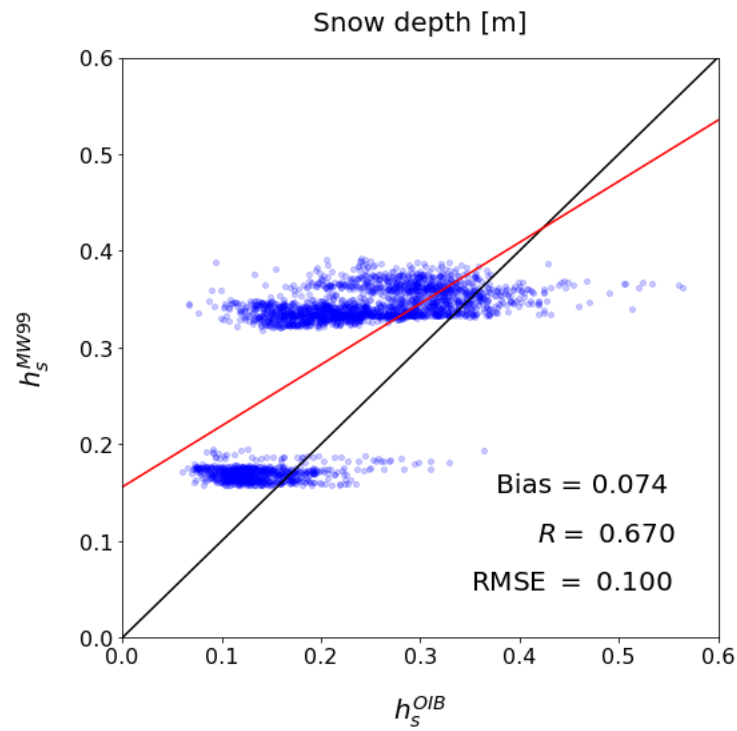

**Figure S1.** Comparison between OIB snow depth ( $h_s^{OIB}$ ) and MW99 ( $h_s^{MW99}$ ) during March of 2011-2015 period. The red line is a linear regression line.

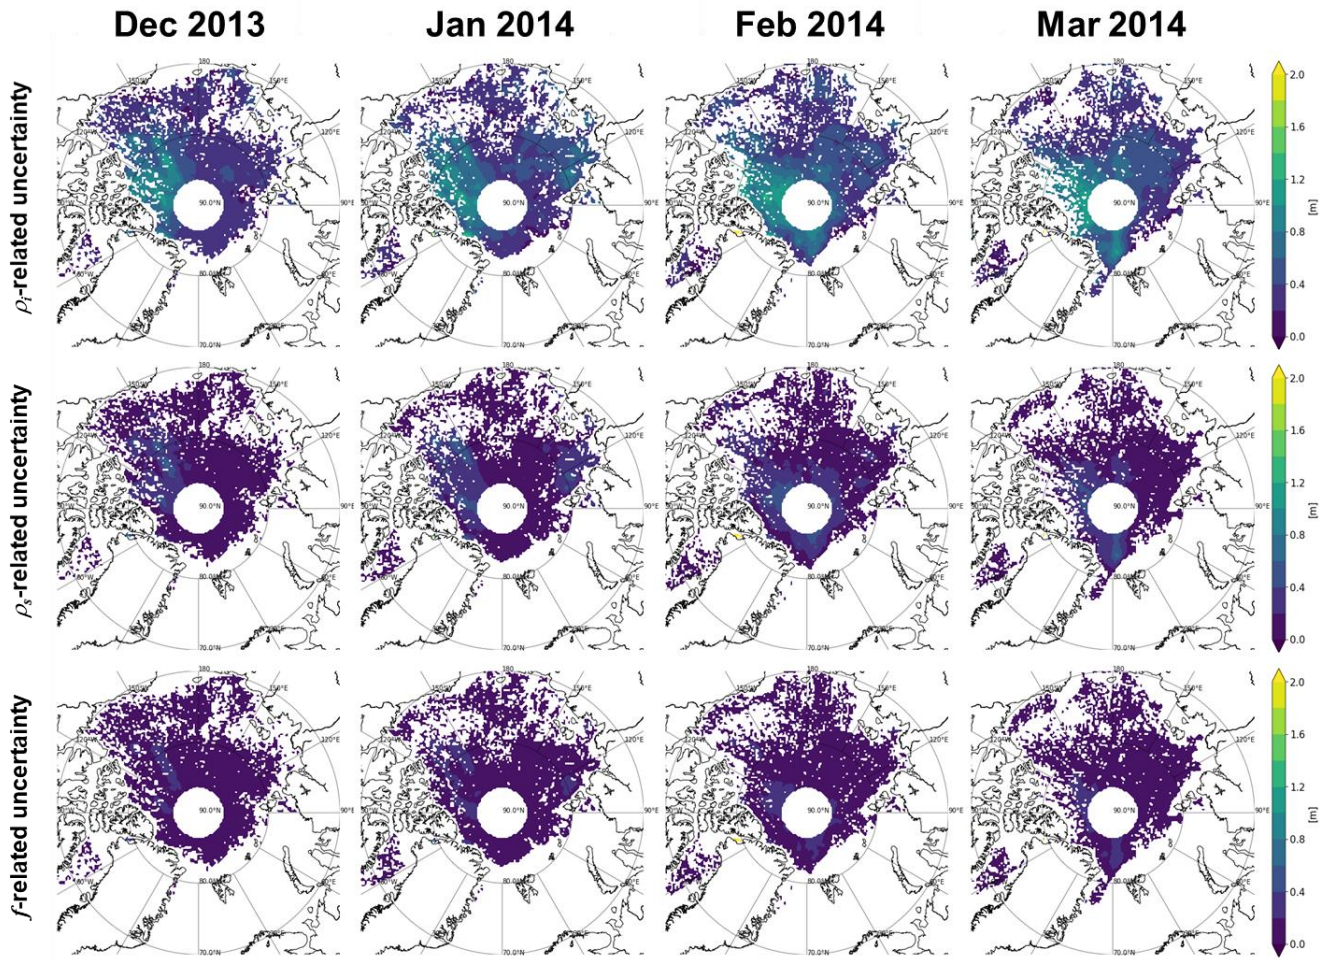

**Figure S2.** Geographical distributions of sea ice thickness uncertainty: (first row)  $\rho_i$ -related uncertainty, (second row)  $\rho_s$ -related uncertainty, and (third row)  $f$ -related uncertainty for the period from December 2013 to March 2014.

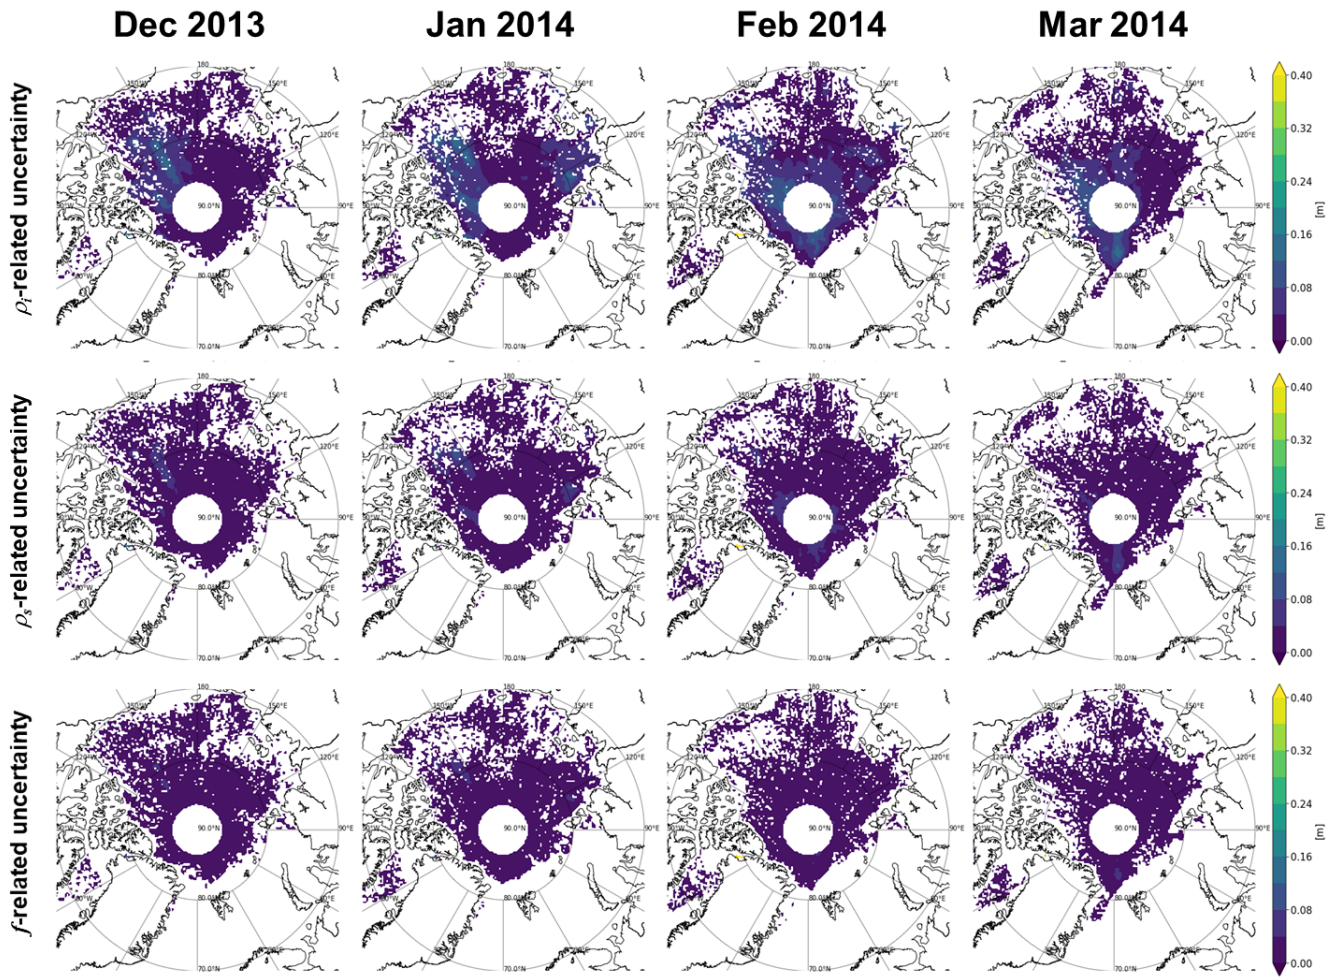

10 **Figure S3.** Geographical distributions of snow depth uncertainty: (first row)  $\rho_T$ -related uncertainty, (second row)  $\rho_S$ -related uncertainty, and (third row)  $f$ -related uncertainty for the period from December 2013 to March 2014.
